# Supplementary material for: Evolution of high-molecular-mass hyaluronic acid is associated with subterranean lifestyle
Source: PubMed Central journal article supplement (PMC10698142; doi:10.1038/s41467-023-43623-2), 2023-12-05
Supplement: 41467_2023_43623_MOESM3_ESM.pdf [file 41467_2023_43623_MOESM3_ESM.pdf]

## **Description of Additional Supplementary Files**

File Name: Supplementary Data 1

Description: Positively selected genes identified in different species and lineages using phylogeny including plateau zokor and bamboo rat.

File Name: Supplementary Data 2

Description: Positively selected genes identified in different species and lineages using phylogeny without plateau zokor and bamboo rat.

File Name: Supplementary Data 3

Description: ECM-related GO terms enriched by the higher expressed genes in subterranean skin and lung.
